# Supplementary material for: BLM helicase suppresses recombination at G-quadruplex motifs in transcribed genes
Source: PubMed Central journal article supplement (PMC5773480; doi:10.1038/s41467-017-02760-1), 2018-01-18
Supplement: 41467_2017_2760_MOESM1_ESM.pdf [file 41467_2017_2760_MOESM1_ESM.pdf]

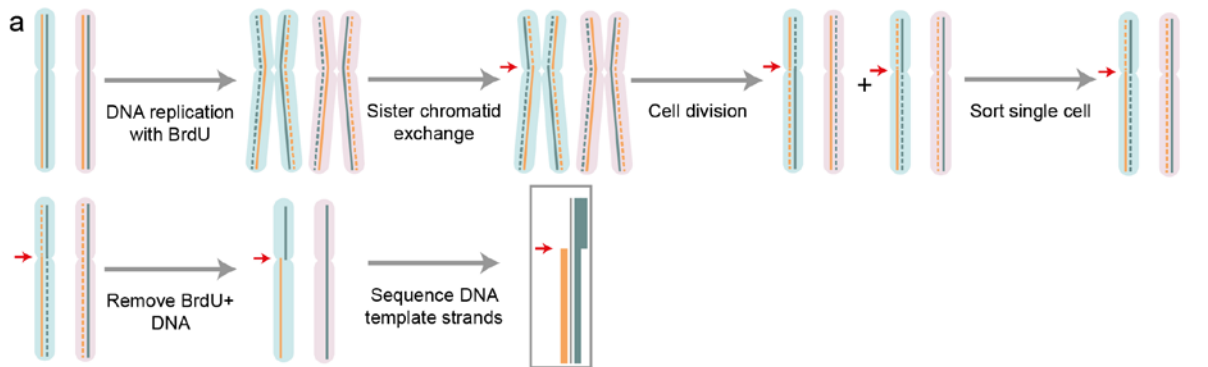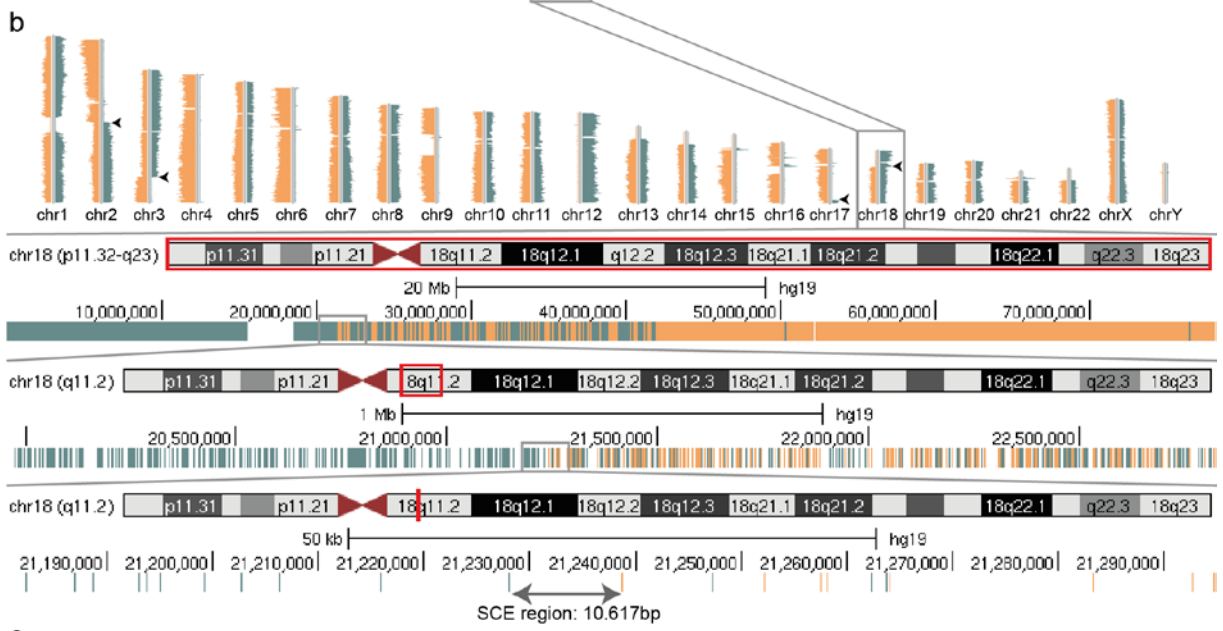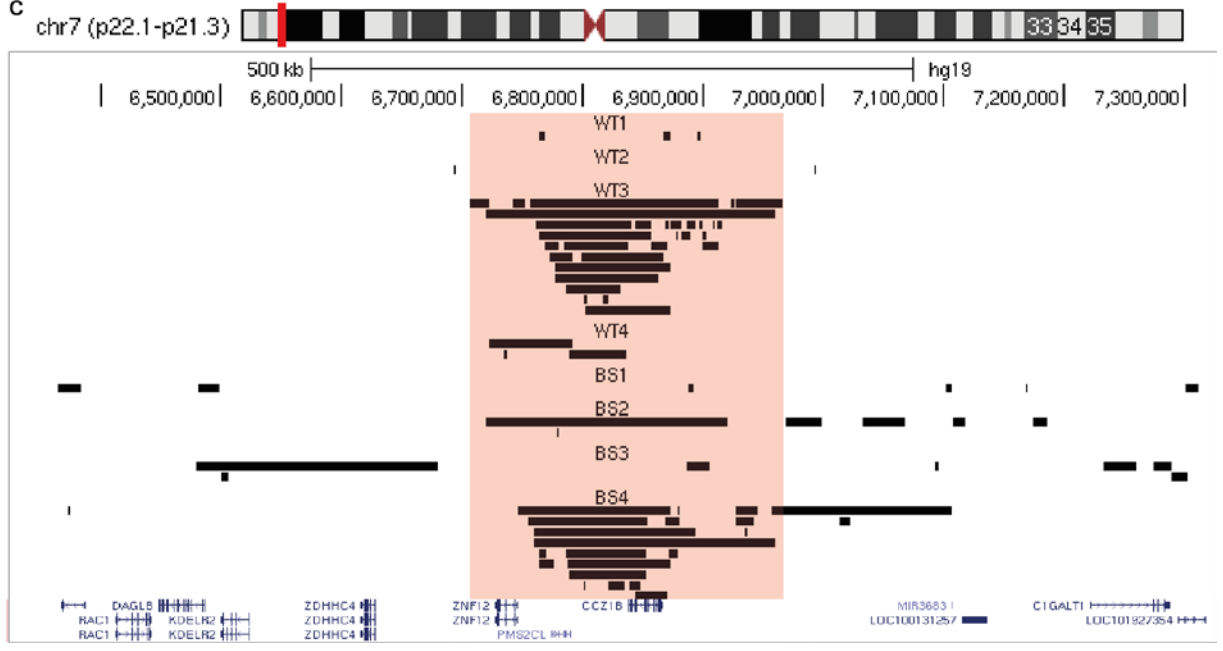

## **Supplementary Figure 1. High resolution SCE mapping using Strand-seq, Related to Figure 1.**

(a) Strand-seq allows for SCE identification as a changes in strand orientation in chromosomal DNA template strands. To this end, asynchronously cycling cells are pulsed with the thymidine-analog bromodeoxyuridine (BrdU) for one round of DNA replication and cell division. BrdU is incorporated into newly synthesized DNA strands during S-phase (dotted lines), leading to hemi-substituted sister chromatids where one sister has the template Watson strand (orange) and the other has the template Crick strand (green). An SCE event (indicated by red arrow) causes an exchange of DNA template strands, leading to both sister chromatids having a partial Watson and a partial Crick template strand. After cell division, each daughter cell has inherited one homolog where an SCE has occurred, and one unaffected homolog. At this point, single cells are sorted, BrdU-labelled DNA is selectively degraded, and the remaining DNA is sequenced. SCEs are subsequently identified and mapped as changes in DNA strand orientation from Watson to Crick, or vice versa (further explained in Supplementary Figure 1b).

(b) Example of high resolution SCE mapping in a Strand-seq library made from a BS fibroblast (same library as shown in Fig. 1b). SCE on chromosome 18 displays template strand state change from Crick-Crick (solid green) to Watson-Crick (mixed green-orange). Zooming in on approximate SCE region allows for identification of individual reads flanking the switch from Crick to Watson. The SCE is mapped to the region between these reads, in this case a 10.617bp region. The BAIT software package<sup>56</sup> was used for automated SCE mapping. This software calculates ratios of Watson/Crick reads in a bin (1 for 100% Watson reads, -1 for 100% Crick reads, and 0 for 50% Watson/Crick), identifies SCEs as changes in this ratio along chromosomal segments, and then localizes SCEs to the locations of the ratio switch based on the first 20 reads flanking each site of the SCE region.

(h) Example of SCE hotspot detected within FRA7B. Mapped SCE regions for each cell line were uploaded onto the UCSC Genome Browser. Black bars represent genomic locations of

SCE regions; size indicates mapping resolution using the BAIT program. Red box indicates the location of the SCE hotspot as detected by Strand-seq.

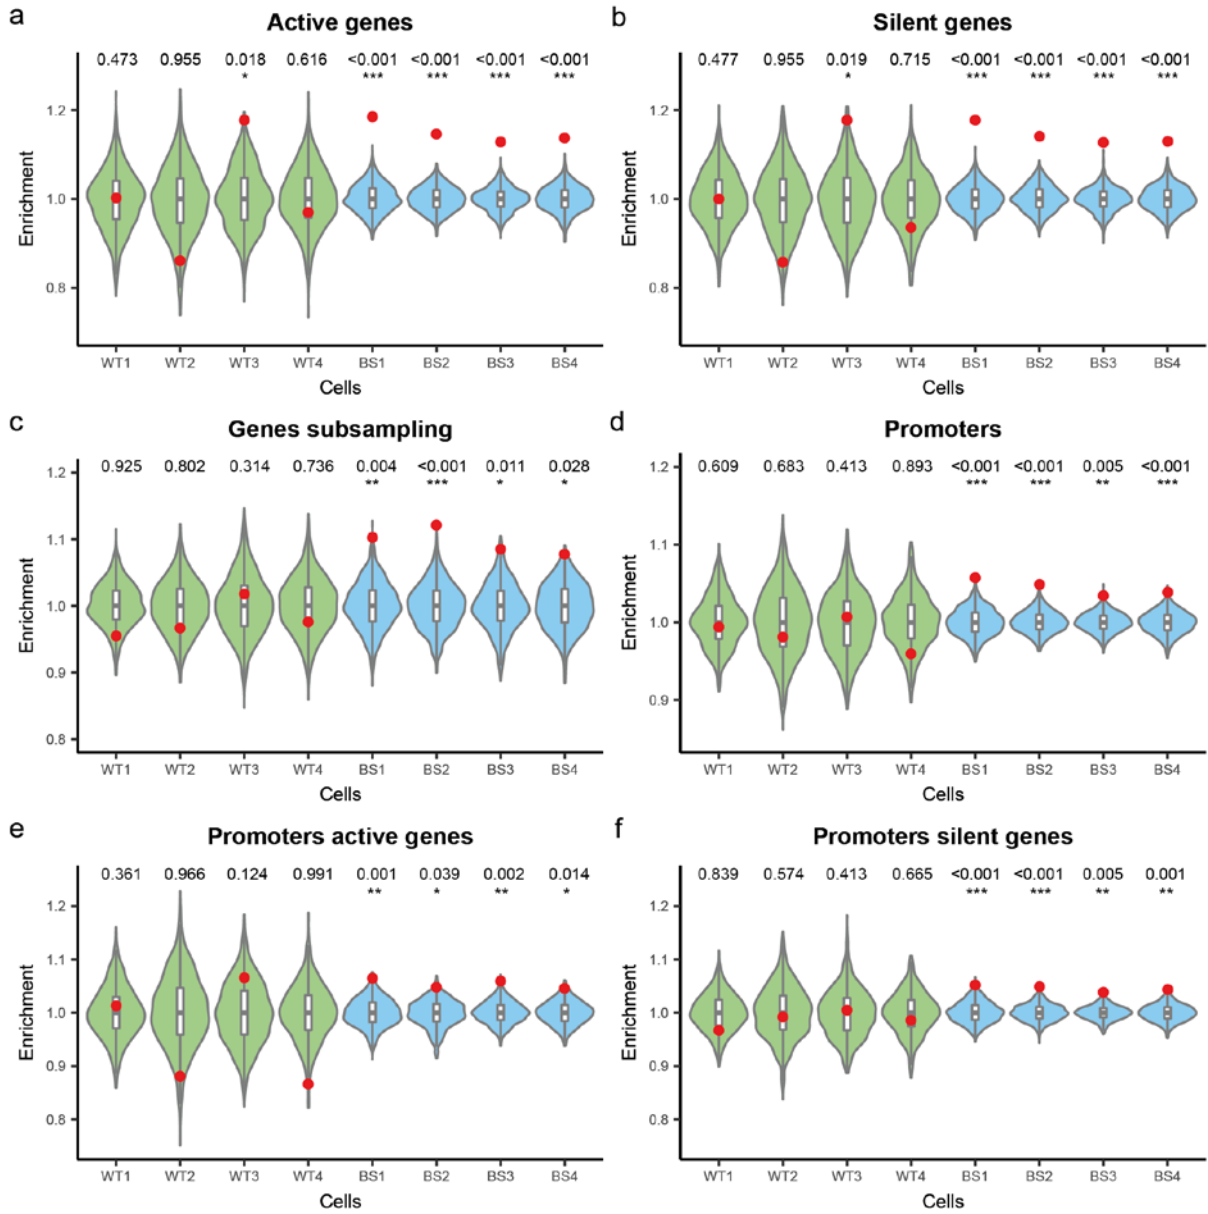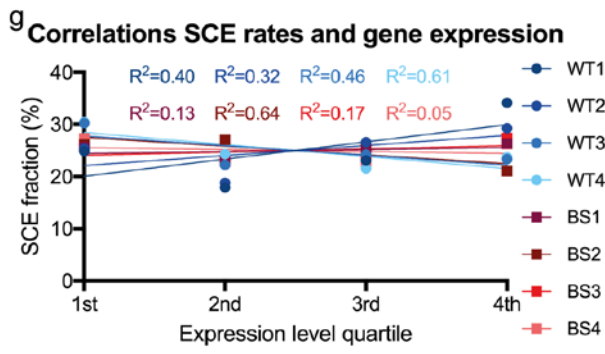

**Supplementary Figure 2. SCE enrichments in genes and promoters, and effect of transcriptional activity, Related to Figure 2.**

Relative SCE enrichments (red points) over random distributions (violin plots) for SCEs overlapping (a) transcribed genes; (b) non-transcribed genes; (c) genes after SCE subsampling; (d) promoter regions; (e) promoter regions associated with active genes, and; (f) promoter regions associated with silent genes. SCE subsampling was achieved by randomly selecting 1559 SCEs (the number of SCEs mapped in the smallest dataset) for each randomized permutation, as well as for the overlap of experimentally determined SCE regions with genes or promoter regions. P-values indicate the fraction of permuted overlaps (out of 1.000 permutations) equal to or higher than overlap with observed SCE regions. Significant p-values are indicated as follows: \*:  $p < 0.05$ , \*\*:  $p < 0.01$ , \*\*\* $p < 0.001$ . (g) All active genes were divided into four categories of expression levels (low, medium-low, medium-high, and high) based on RPKM values. The number of SCEs overlapping all genes in each category was determined, and plotted as a fraction of the total number of SCEs overlapping active genes after correcting for the cumulative size of all genes in each category.

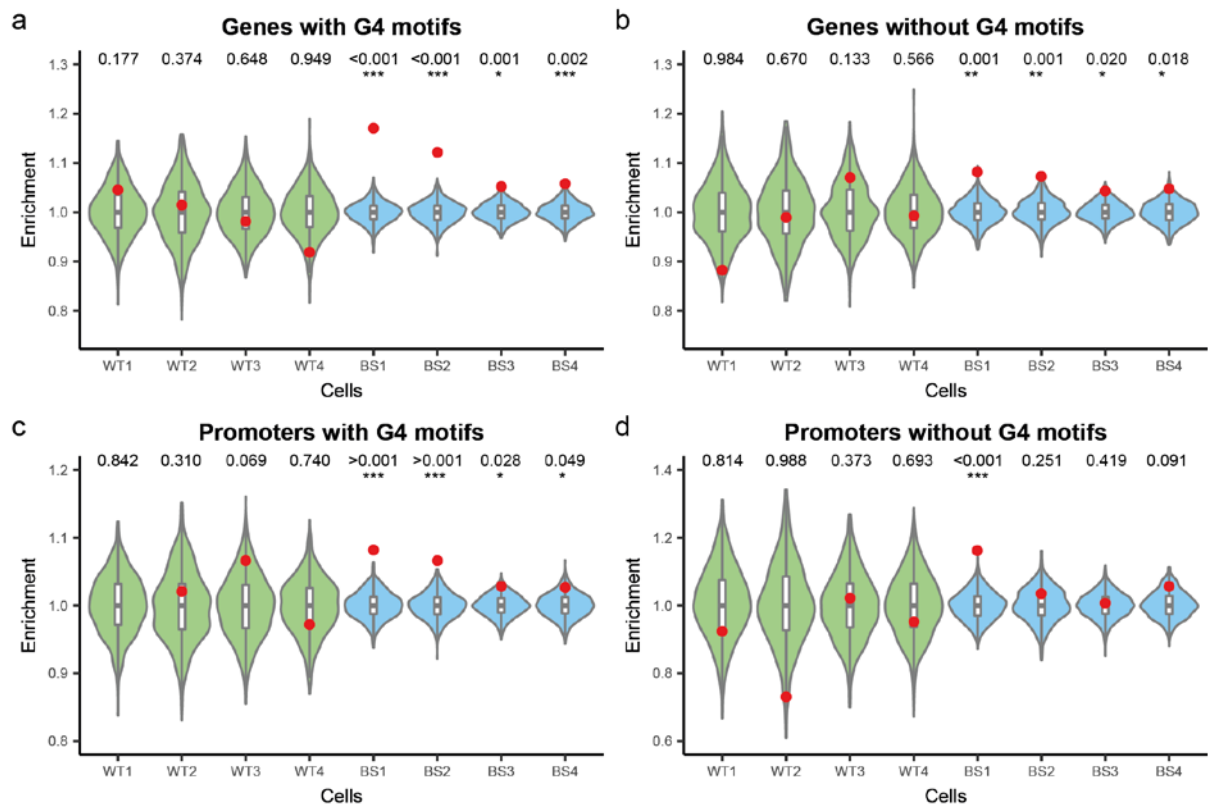

**Supplementary Figure 3. SCE enrichments in genes containing and lacking G4 motifs, Related to Figure 2.** Relative SCE enrichments (red points) over random distributions (violin plots) for SCEs overlapping (a) genes containing one or more G4 motifs; (b) genes lacking any G4 motifs; (c) promoters regions containing one or more G4 motifs; and (d) promoter regions lacking any G4 motifs. P-values indicate the fraction of permuted overlaps (out of 1.000 permutations) equal to or higher than overlap with observed SCE regions. Significant p-values are indicated as follows: \*:  $p < 0.05$ , \*\*:  $p < 0.01$ , \*\*\* $p < 0.001$ .

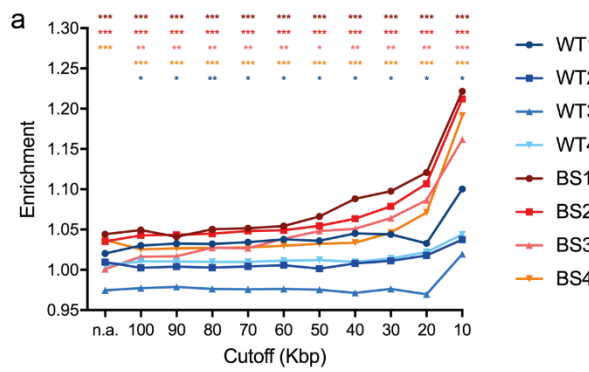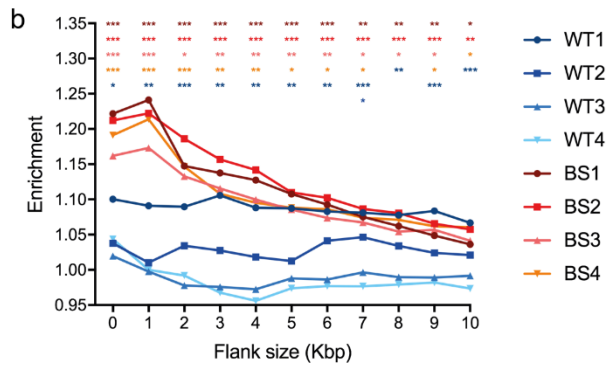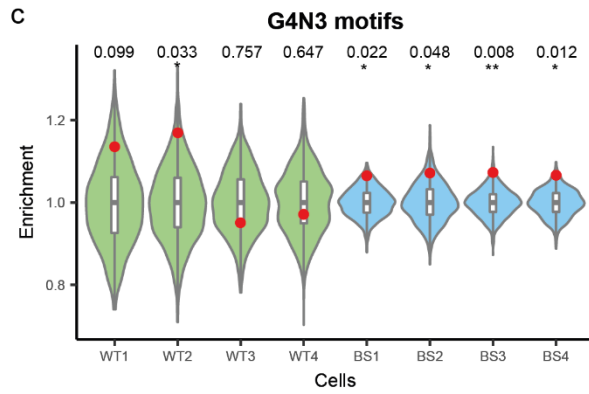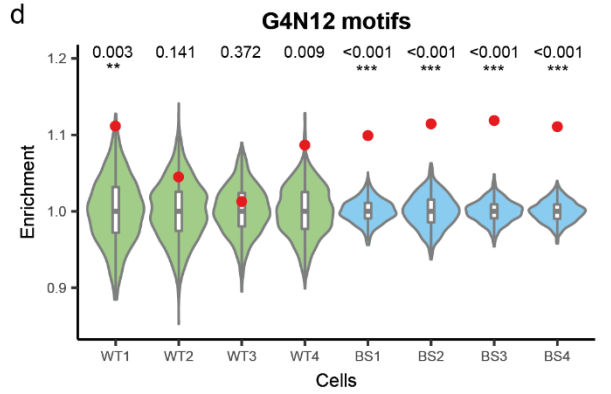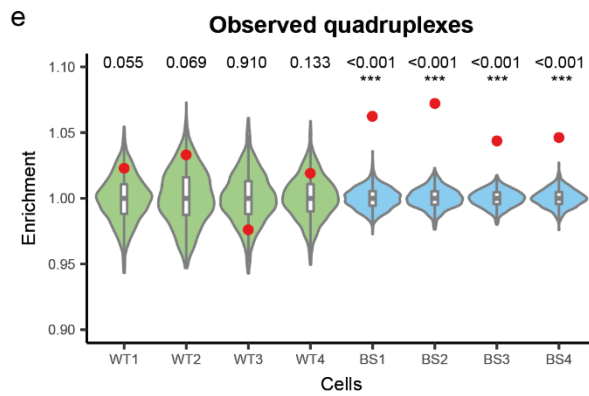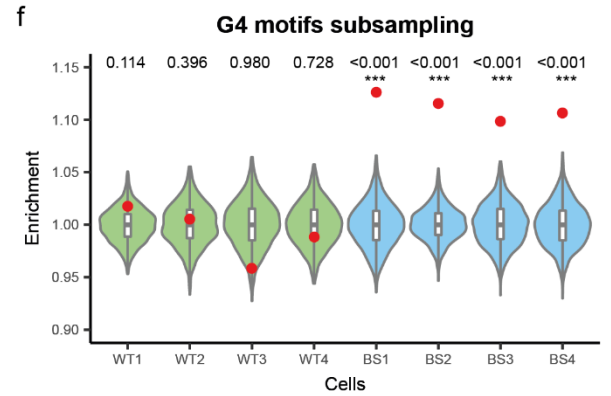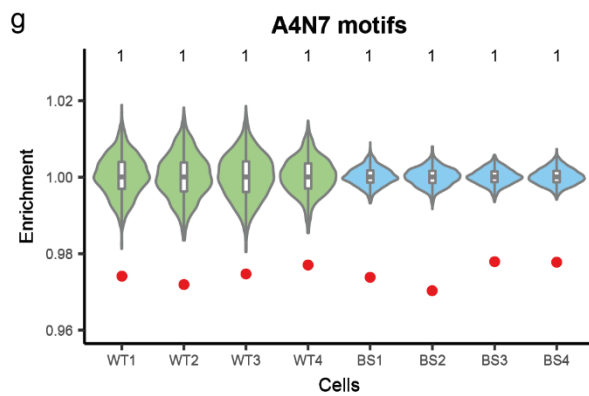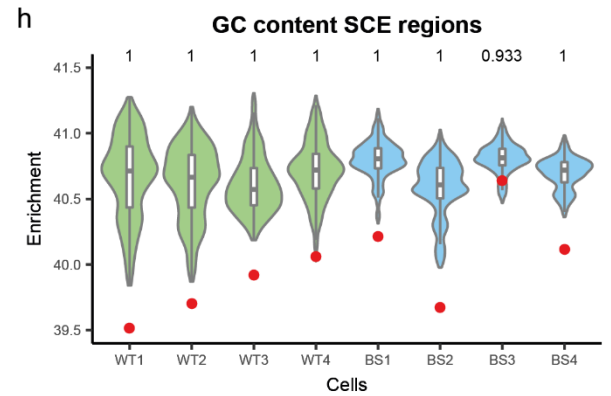

**Supplementary Figure 4. SCE enrichments at alternate G4 motifs, effect of different SCE size cutoffs, Related to Figure 2.**

(a) Effect of differently size cutoffs for SCE regions included in analysis of relative SCE enrichment over median permuted overlaps. \*:  $p < 0.05$ , \*\*:  $p < 0.01$ , \*\*\*  $p < 0.001$  for color-matched cell line.

(b) Effect of adding increasingly large flanking regions to <10Kb SCE regions on relative SCE enrichment over median permuted overlaps. \*:  $p < 0.05$ , \*\*:  $p < 0.01$ , \*\*\*  $p < 0.001$  for color-matched cell line.

(c-h) Relative SCE enrichments (red points) over random distributions (violin plots) for SCEs overlapping the alternate G4 motifs (c)  $G_{3+}N_{1-3}G_{3+}N_{1-3}G_{3+}N_{1-3}G_{3+}$ ; and (d)  $G_{3+}N_{1-12}G_{3+}N_{1-12}G_{3+}N_{1-12}G_{3+}$ ; (e) canonical G4 motifs after subsampling SCE regions; (f) previously reported observed quadruplex forming regions; (g)  $A_{3+}N_{1-7}A_{3+}N_{1-7}A_{3+}N_{1-7}A_{3+}$  motifs; (h) and GC content of all SCE regions For enrichment analyses. P-values indicate the number of permuted overlaps equal to or higher than overlap with SCE regions. SCE subsampling was achieved by randomly selecting 1559 SCEs (the number of SCEs mapped in the smallest dataset) for each randomized permutation, as well as for the overlap of experimentally determined SCE regions with genes or promoter regions. An SCE region size cutoff of 10Kb was used for these analyses. P-values indicate the fraction of permuted overlaps (out of 1.000 permutations) equal to or higher than overlap with observed SCE regions. Significant p-values are indicated as follows: \*:  $p < 0.05$ , \*\*:  $p < 0.01$ , \*\*\*  $p < 0.001$ .



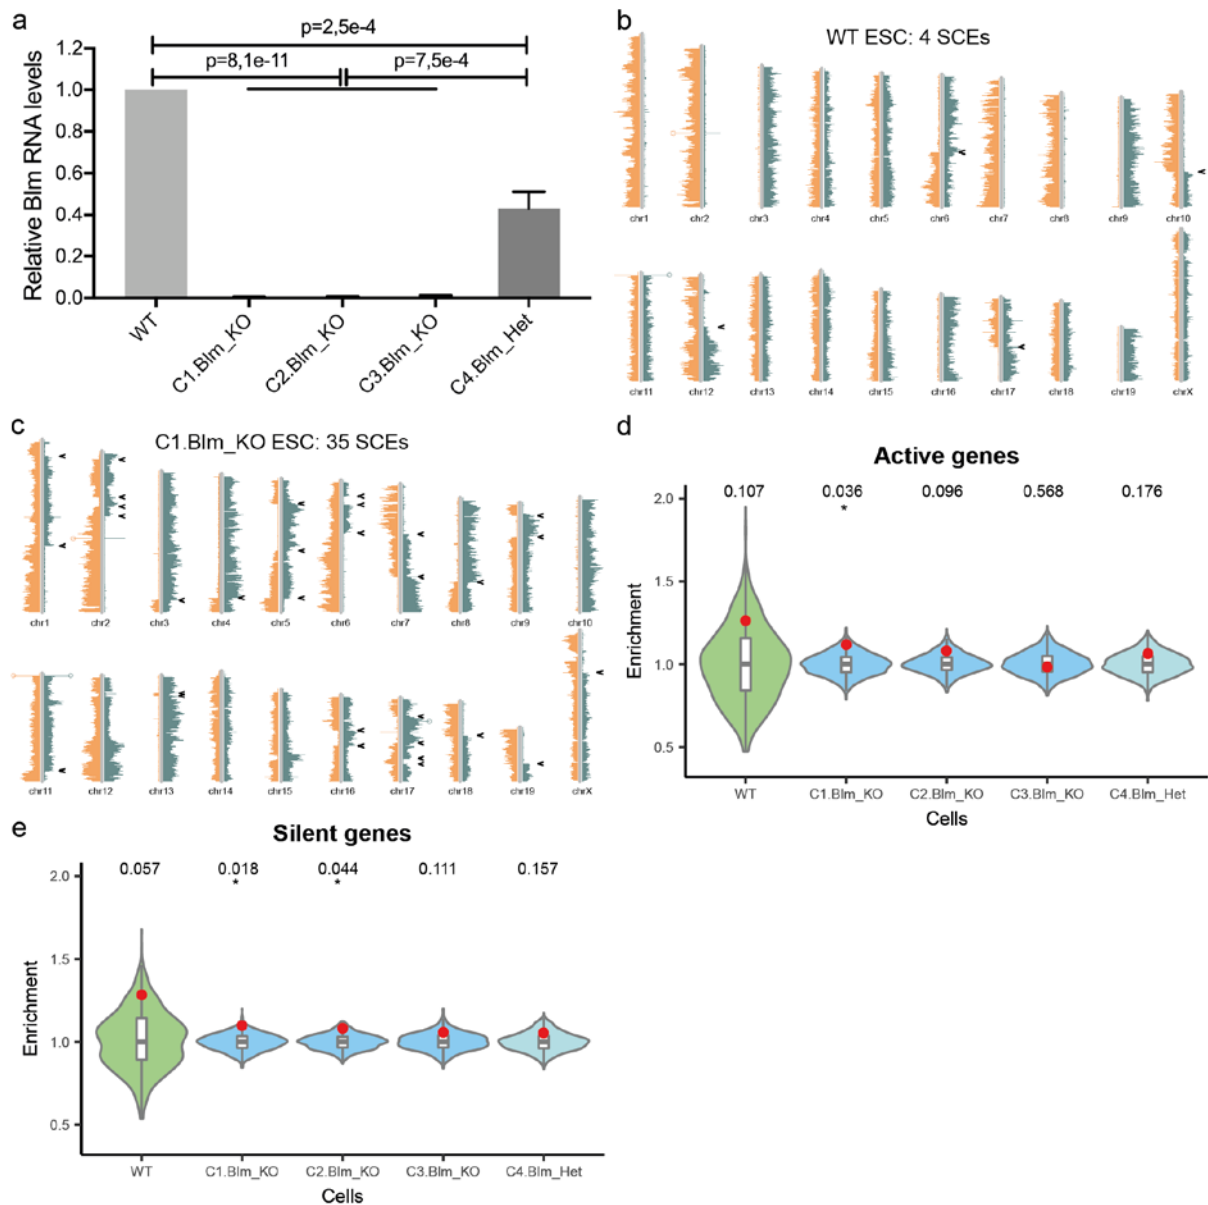

**Supplementary Figure 5. Effect of *Blm* knockout on SCE rates and SCE enrichment at in genes, Related to Figure 4.**

(a) qRT-PCR for *Blm* transcripts in WT and *Blm* mutant cell lines. Expression levels were normalized to levels in WT cells for each of three replicate experiments. P-values were calculated using t-test and ANOVA.

(b-c) Representative Strand-seq libraries generated from (b) a WT and (c) a C1.*Blm*<sup>-/-</sup> cell. Mapped DNA template strand reads are plotted on directional chromosome ideograms; Crick

(positive, sense) reads in green, Watson (negative, antisense) reads in orange. SCEs are identified as a switch in template strand state, indicated by black arrowheads.

(d-e) Relative SCE enrichments (red points) over random distributions (violin plots) for SCEs overlapping with one or multiple (d) active genes; and (e) silent genes. P-values indicate the fraction of permuted overlaps (out of 1.000 permutations) equal to or higher than overlap with observed SCE regions. Significant p-values are indicated as follows: \*:  $p < 0.05$ , \*\*:  $p < 0.01$ , \*\*\* $p < 0.001$ .

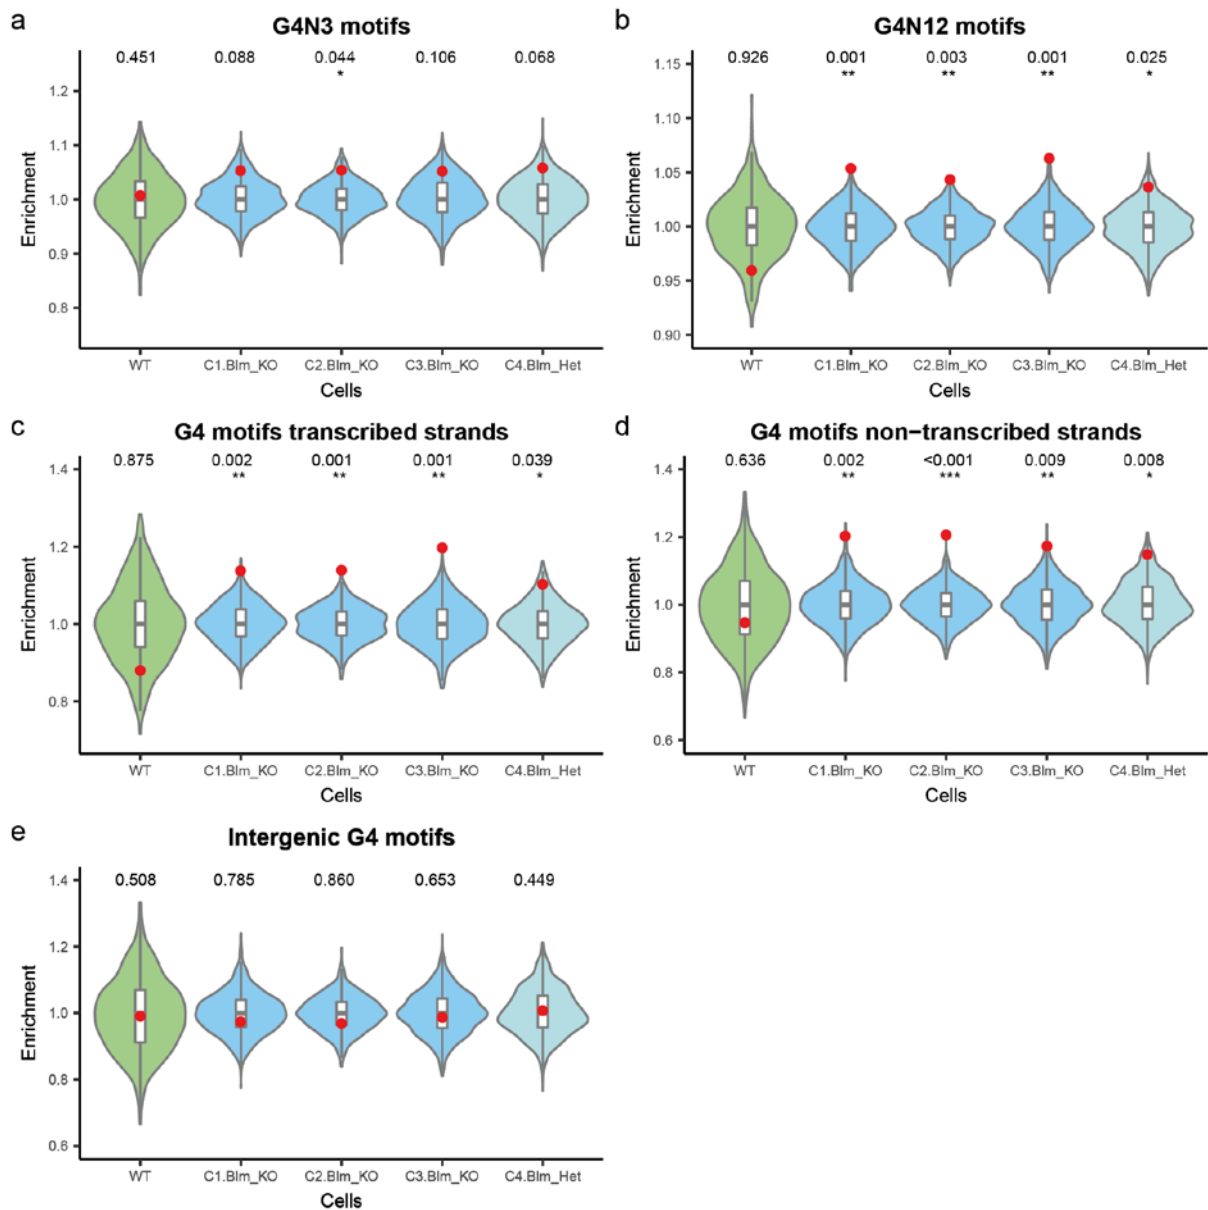

**Supplementary Figure 6. Effect of *Blm* knockout on SCE enrichment at G4 motifs, Related to Figure 4.**

(a-e) Relative SCE enrichments (red points) over random distributions (violin plots) for SCEs overlapping with one or multiple (a) alternate G4 motifs  $G_{3+N_1-3}G_{3+N_1-3}G_{3+N_1-3}G_{3+}$ ; and (b)  $G_{3+N_1-12}G_{3+N_1-12}G_{3+N_1-12}G_{3+}$ ; or canonical G4 motifs occurring in (c) intragenic transcribed strands; (d) intragenic non-transcribed strands; (e) or in intergenic regions. P-values indicate the fraction of permuted overlaps (out of 1.000 permutations) equal to or higher than overlap with observed SCE regions. Significant p-values are indicated as follows: \*:  $p < 0.05$ , \*\*:  $p < 0.01$ , \*\*\* $p < 0.001$ .

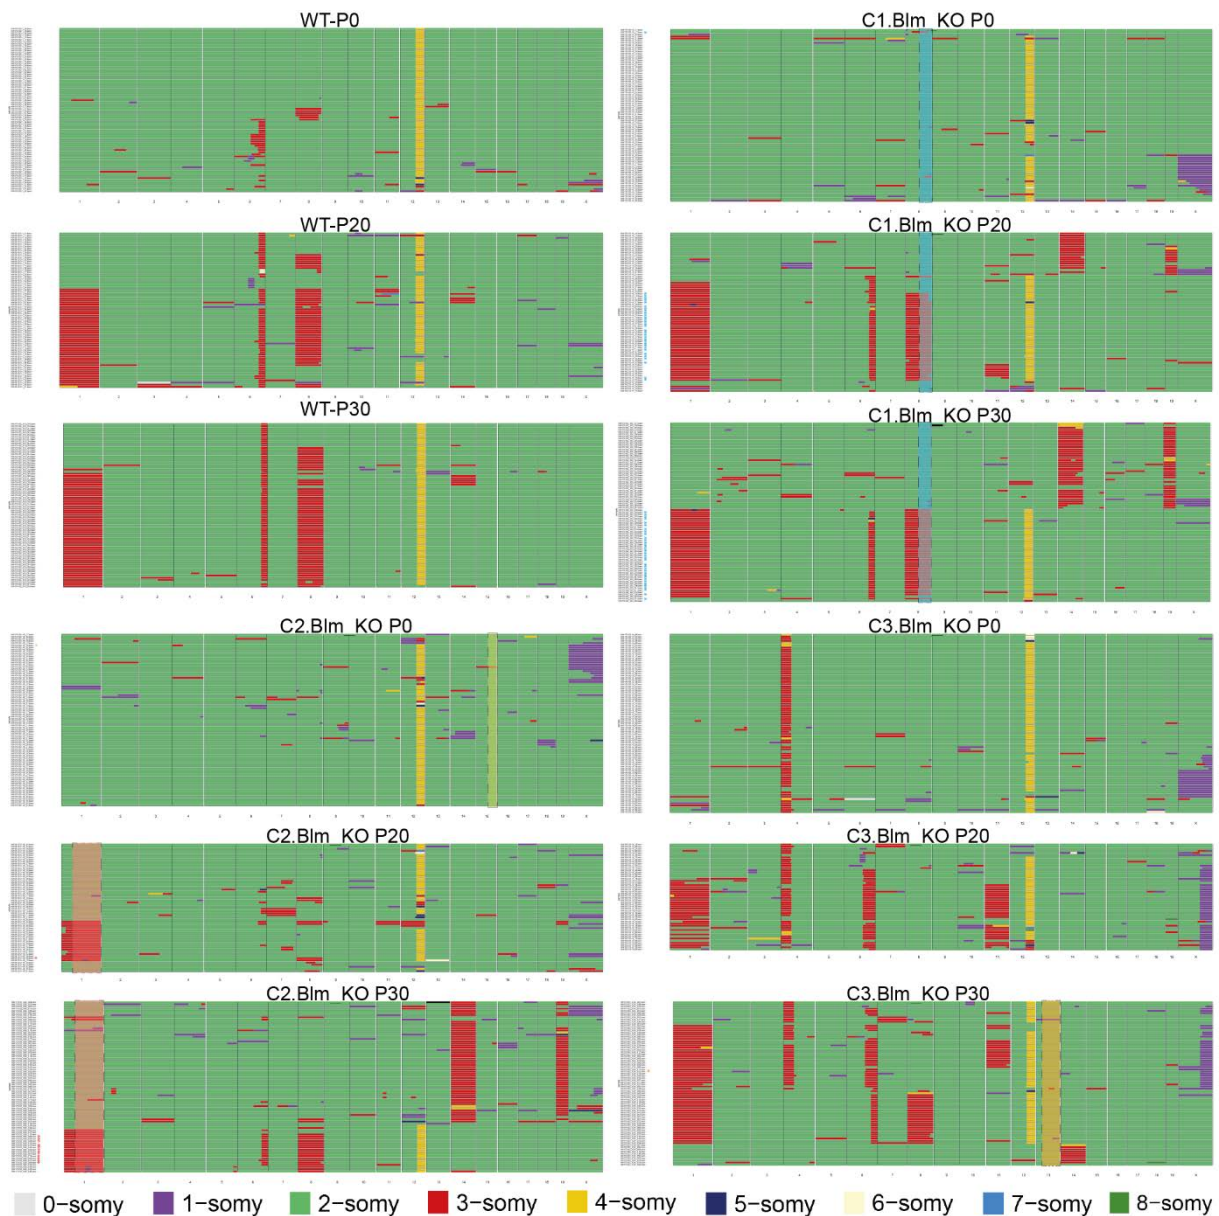

**Supplementary Figure 7. Aneuploidy and CNV analysis in WT and *Blm*<sup>-/-</sup> ES cell lines, Related to Figure 5.**

Graphical representation of chromosome copy number states in single-cell whole genome sequencing libraries prepared from WT and *Blm*<sup>-/-</sup> cells at indicated passage numbers. Each horizontal line represents a single-cell library, with chromosome numbers indicated below each plot. Different colors represent copy number status as detected in 2Mb bins. Cells are clustered based on the similarity of their copy number profile. LOH regions for each population are highlighted (in the same color as Figure 5a), with libraries harboring this LOH region indicated with an asterisk.

| Cell line  | Corriell ID | Cell type                    | Disease state  | Strand-seq libraries (n) | SCEs (n) | Median mapping resolution (bp) | SCE regions <100 Kb (%) |
|------------|-------------|------------------------------|----------------|--------------------------|----------|--------------------------------|-------------------------|
| <i>WT1</i> | GM07492     | Primary fibroblast           | Healthy        | 321                      | 1559     | 15714                          | 95.25                   |
| <i>WT2</i> | GM07545     | Primary fibroblast           | Healthy        | 354                      | 1616     | 11430                          | 96.93                   |
| <i>WT3</i> | GM12891     | EBV-transformed B-lymphocyte | Healthy        | 334                      | 2128     | 7847                           | 96.71                   |
| <i>WT4</i> | GM12892     | EBV-transformed B-lymphocyte | Healthy        | 340                      | 2326     | 10722                          | 96,28                   |
| <i>BS1</i> | GM02085     | Primary fibroblast           | Bloom Syndrome | 328                      | 11156    | 10102                          | 97.58                   |
| <i>BS2</i> | GM03402     | Primary fibroblast           | Bloom Syndrome | 229                      | 8453     | 17497                          | 96.05                   |
| <i>BS3</i> | GM16375     | EBV-transformed B-lymphocyte | Bloom Syndrome | 326                      | 14667    | 13064                          | 96.94                   |
| <i>BS4</i> | GM17361     | EBV-transformed B-lymphocyte | Bloom Syndrome | 306                      | 12724    | 10805                          | 95.99                   |

**Supplementary Table 1. Overview of human cell lines used, Strand-seq libraries made, and SCEs identified and mapped, Related to Figures 1-3.**

| Clone             | sgRNAs | Allele      | Deletion coordinates       | Strand-seq libraries (n) | SCEs (n) | Median mapping resolution (bp) | SCE regions <100 Kb (%) |
|-------------------|--------|-------------|----------------------------|--------------------------|----------|--------------------------------|-------------------------|
| <i>WT</i>         | n.a.   | Cast<br>129 | Not mutated<br>Not mutated | 98                       | 244      | 8048                           | 99.16                   |
| <i>C1.Blm_KO</i>  | 1+2    | Cast<br>129 | 71163-71636<br>71167-71396 | 91                       | 3048     | 7392                           | 98.59                   |
| <i>C2.Blm_KO</i>  | 3+4    | Cast<br>129 | 71166-72195<br>71166-72195 | 97                       | 3801     | 6251                           | 98.01                   |
| <i>C3.Blm_KO</i>  | 1+2    | Cast<br>129 | 71161-71570<br>71161-71570 | 67                       | 2597     | 6722                           | 98.51                   |
| <i>C4.Blm_Het</i> | 3+4    | Cast<br>129 | 71377-71848<br>Not mutated | 107                      | 2437     | 7554                           | 97.58                   |

**Supplementary Table 2. Overview of *Blm* mutant mouse ES cell lines generated and used for this study, Related to Figures 4-5.**
